# Supplementary material
Source: MDPI journal article supplement (https://www.mdpi.com/2073-4441/13/9/1149)
Supplement: s1 [file s1]

## Supplementary Materials

### Comparison of invasive apple snail (*Pomacea canaliculata*) behaviors in different water temperature gradients

Mi-Jung Bae, Eui-Jin Kim, and Young-Seuk Park

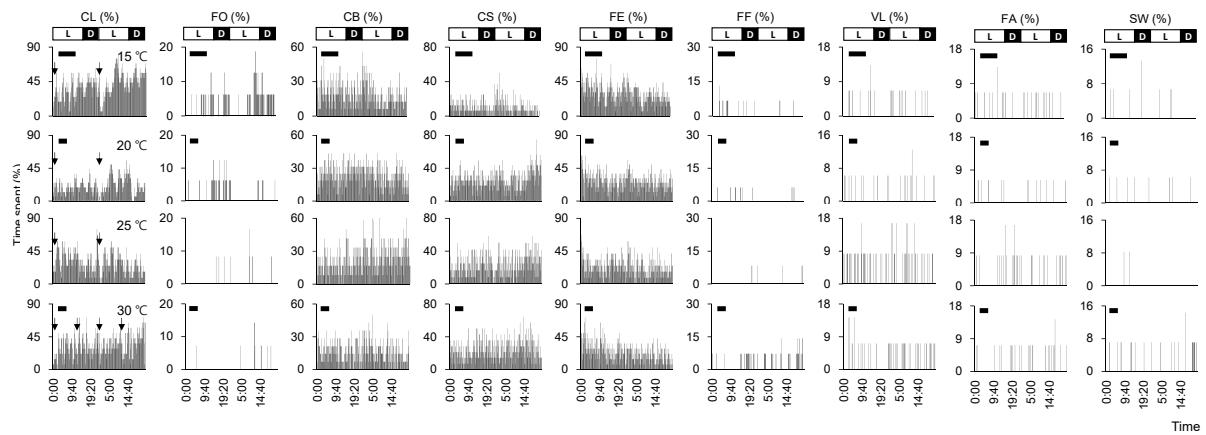

Figure S1. Behavior patterns of *Pomacea canaliculata* under different temperature-changing conditions (15 °C, 20 °C, 25 °C (control) and 30 °C). Black bar represents the durations to change water temperature, L: Light condition; D: Dark condition; FO: floating; CL: clinging on the side of the aquarium; CB: crawling on the bottom of the aquarium; CS: crawling on the side of the aquarium; FE: feeding on lettuce; FF: folding a funnel with its food; SW: swimming; VE: ventilating the lung; and FA: falling. Arrows present the time for the replacement of lettuce as food.
